# Supplementary material for: Molecular and clinical characterization of two independent Chinese families with protein C deficiency
Source: Research Square preprint supplement (doi:10.21203/rs.3.rs-4372666/v1), 2024-06-04
Supplement: Supplementary file 1 [file 2c3d77fb2ed825d5f8004323.docx]

Table 2． Phenotypes and genotypes of two hereditary protein C deficiency families

| **Patient** | **D-D（mg/L）** | **PS:A（%）** | **AT:A（%）** | **PC:A（%）** | **PC:Ag（%）** | **Mutation** |
| --- | --- | --- | --- | --- | --- | --- |
| Family A | | | | | | |
| Ⅰ1 | 0.38 | 93 | 109 | 113 | 109 | Wild-type |
| Ⅰ2 | 0.24 | 91 | 102 | 48 | 50 | Arg440Cys |
| Ⅱ1 | 0.21 | 92 | 103 | 51 | 56 | Arg440Cys |
| Proband A | 0.18 | 89 | 106 | 55 | 53 | Arg440Cys |
| Ⅱ3 | 0.32 | 82 | 111 | 102 | 105 | Wild-type |
| Ⅲ1 | 0.33 | 83 | 108 | 98 | 95 | Wild-type |
| Family B | | | | | | |
| Proband B | 0.27 | 92 | 98 | 40 | 39 | Trp444Arg |
| Ⅱ2 | 0.24 | 93 | 103 | 98 | 102 | Wild-type |
| Ⅲ1 | 0.24 | 89 | 114 | 94 | 97 | Wild-type |
| Ⅲ2 | 0.25 | 91 | 99 | 49 | 50 | Trp444Arg |
| Ⅲ3 | 0.31 | 85 | 105 | 95 | 101 | Wild-type |
| Ⅳ1 | 0.26 | 90 | 108 | 43 | 42 | Trp444Arg |
| Ⅳ2 | 0.28 | 87 | 113 | 99 | 109 | Wild-type |
| Normal range | 0~5 | 65~135 | 98~118 | 70~130 | 70~140 | - |
