# Supplementary material for: Molecular and clinical characterization of two independent Chinese families with protein C deficiency
Source: Research Square preprint supplement (doi:10.21203/rs.3.rs-4372666/v1), 2024-06-04
Supplement: Supplementary file 2 [file 7c441e8ffd98c89c25e00471.docx]

| Primer | Forward sequence | Reverse sequence |
| --- | --- | --- |
| Exon 1 | GCTGAGCTAGGACCAGGAGTC | CAAAGGGACCTGAGACTGTGG |
| Exon 2 | TGCTTTCTAGGCAGGCAGTGT | GGAGGGAGCTTTAGGAGGTCA |
| Exon 3 | CATCTCAGAGCAAGGCTTCGT | CTCCTAAGAGGGCCTCAGCAT |
| Exon 4-6 | GGAGTGATGGGACTGGAAGGA | CGTGATTCCTGGGCGATGTA |
| Exon 7 | AGGGAACCCAGGAAAGTG | CTCCAGCCCATACCAAGC |
| Exon 8 | AGGGAACCCAGGAAAGTG | CTCCAGCCCATACCAAGC |
| Exon 9a | ATGCCCATATGACCAGGGAAC | GGGAGTGGAGAGGTGAAGGTC |
| Exon 9b | GGGCTCCTTCACAACTACGG | GTCAAGCCTCACCTTCAGCA |

Table 1 List of PCR primers
