# Supplementary material for: Molecular and clinical characterization of two independent Chinese families with protein C deficiency
Source: Research Square preprint supplement (doi:10.21203/rs.3.rs-4372666/v1), 2024-06-04
Supplement: Supplementary file 3 [file a22710ed002394b0ca618e59.docx]

Table 3．The analysis of four online bioinformatics software

| Gene type | Mutation taster | FATHMM | PolyPhen-2 | PROVEAN |
| --- | --- | --- | --- | --- |
| Arg440Cys | Disease causing | DAMAGING | PROBABLY DAMAGING | Deleterious |
| Trp444Arg | Disease causing | DAMAGING | PROBABLY DAMAGING | Damaging |
